# Supplementary material for: Involvement of S1P1 receptor pathway in angiogenic effects of a novel adenosine-like nucleic acid analog COA-Cl in cultured human vascular endothelial cells
Source: PubMed Central journal article supplement — Pharmacol Res Perspect. 2014 Aug 6;2(5):e00068. doi: 10.1002/prp2.68 (PMC4186426; doi:10.1002/prp2.68), 2014-08-06

## **Supplementary Methods**

### **Primer sequences used in the RT-PCR analyses**

The primer oligonucleotide sequences used in the RT-PCR assays were:

5'-GAG CAC TAC GCA GTC AGT CG-3' (sense) and 5'-TTT TCC TTG GCT GGA GAG G-3' (antisense) for S1P<sub>1</sub> (Genbank accession number NM\_001400.4); 5'-CAT TGT TTT GAA CTA GGT GGA CA-3' (sense) and 5'-CAA GCC TTT TTG GGG AAT TT-3' (antisense) for S1P<sub>3</sub> (Genbank accession number NM\_005226.2); 5'-CCG CTC AAG CCA CGC TGA CA-3' (sense) and 5'-CGG CTG CGC CAC GTG TAG AT-3' (antisense) for S1P<sub>2</sub> (Genbank accession number NM\_004230.3); 5'-GAA CAT TTG GGA AAT CTC TTG C-3' (sense) and 5'-CGG AAG AAC AAT GTA GTC TTT GC-3' (antisense) for VEGFR2 (Genbank accession number NM\_002253.2); and 5'-ACC ACA GTC CAT GCC ATC AC-3' (sense) and 5'-TCC ACC ACC CTG TTG CTG TA-3' (antisense) for GAPDH (Igarashi *et al*, 2007), respectively.

### **cAMP assay**

HUVEC in a 6 well plate were treated with various agents in the presence of 500  $\mu$ M of isobutylmethylxanthine. They were then scraped into 200  $\mu$ L of 100  $\mu$ M HCl and subjected to enzyme-linked immunosorbent assay using a commercially available assay kit (Cayman, Ann Arbor, MI, USA) following the instruction.

## Supplementary Figure Legends

### Figure S1. Pharmacological characterization of HUVEC responses to COA-Cl.

Panel A shows the results of cAMP assay. HUVEC were treated for 30 min with forskolin (25  $\mu$ M) or W146 (10  $\mu$ M), followed by COA-Cl (100  $\mu$ M for 10 min), as indicated. They were then subjected to cAMP determination.  $n = 3$ . Panel B demonstrates the results of immunoblot (IB) analyses, in which HUVEC were treated with DMS (10  $\mu$ M for 30 min), an inhibitor of sphingosine kinase, followed by COA-Cl (100  $\mu$ M for 10 min). Cells were harvested and were subjected to IB using antibodies directed to phospho- and total-ERK1/2, as above.  $n = 3$ . Panel C shows the results of receptor desensitization assay. Some cells had been pre-treated ("Pre-Tx") with COA-Cl (100  $\mu$ M), S1P (100 nM) or vehicle for 60 min prior to COA-Cl (100  $\mu$ M for 10 min).  $n = 3$ .

### Figure S2. Comparison of COA-Cl actions with S1P in HUVEC.

Shown in Panel A are the results of immunoblot assays using the cell lysates derived from HUVEC treated with S1P (1  $\mu$ M) or with COA-Cl (100  $\mu$ M) for the times indicated, performed in an identical culture batch. They were subjected to IB for phospho- and total-ERK1/2 as above. Blots were also re-probed with antibodies directed to phospho- and total-Akt, as well. The degrees of ERK1/2 phosphorylation were quantified and are summarized in a graph shown in the Panel B.  $n = 4$ . Shown in Panels C and D are the results of tube formation assays, in which cells were treated with vehicle, VEGF (10 ng/mL), S1P (1  $\mu$ M), or COA-Cl (100  $\mu$ M), performed in the identical cellular preparations.  $n = 5$ .

**A)**

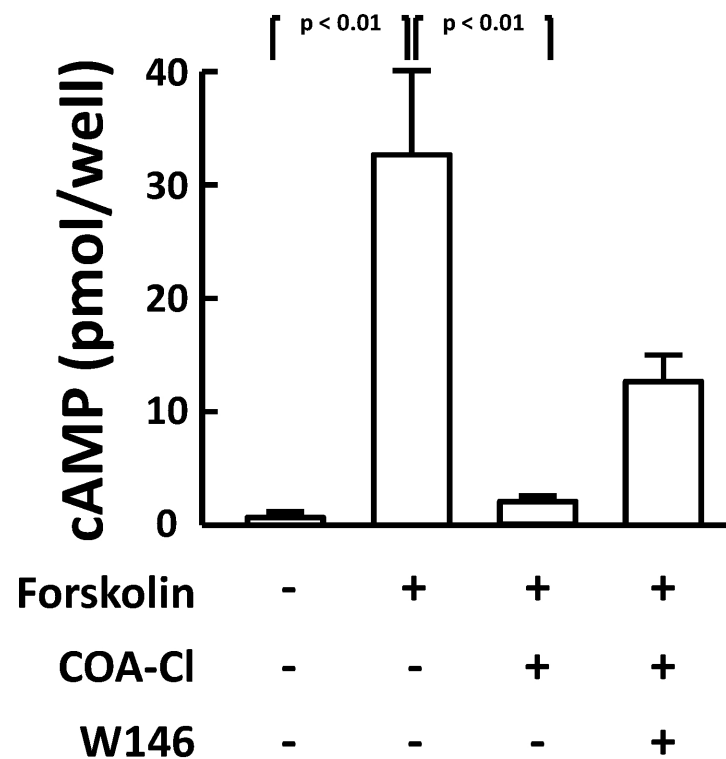

**B)**

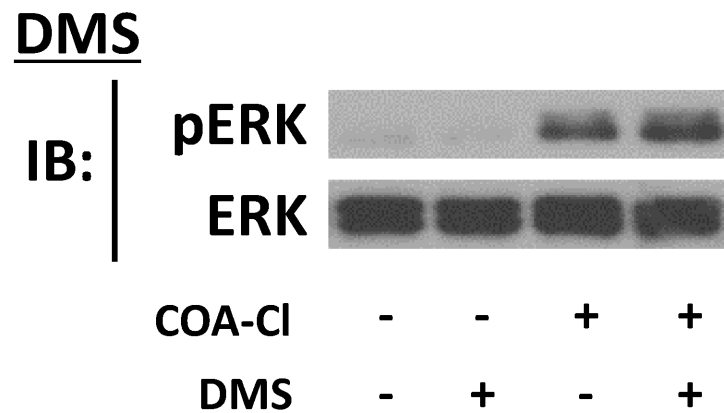

**C)**

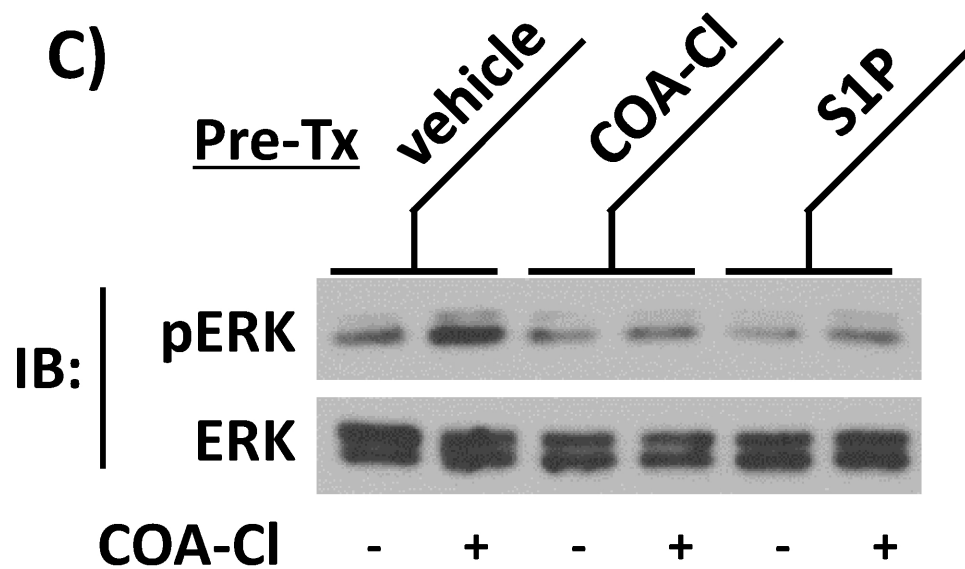

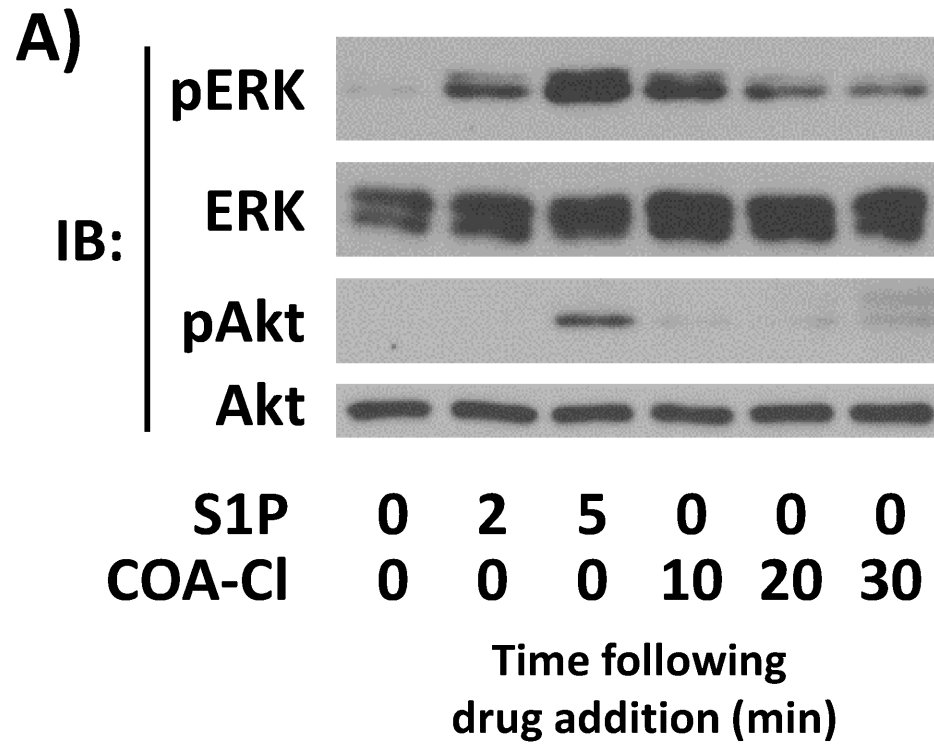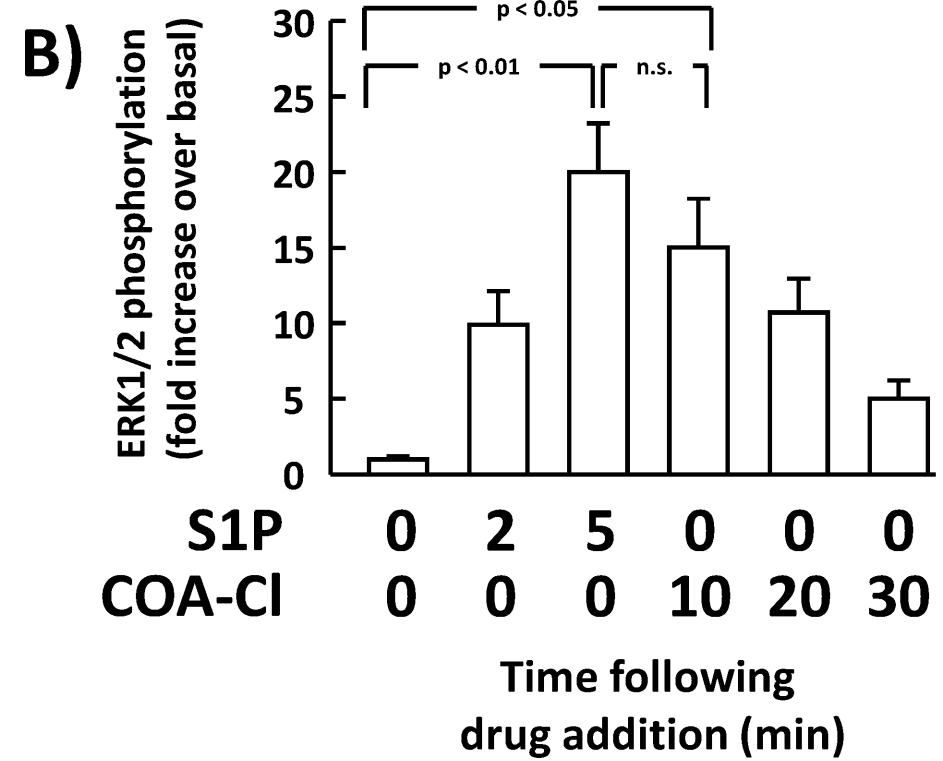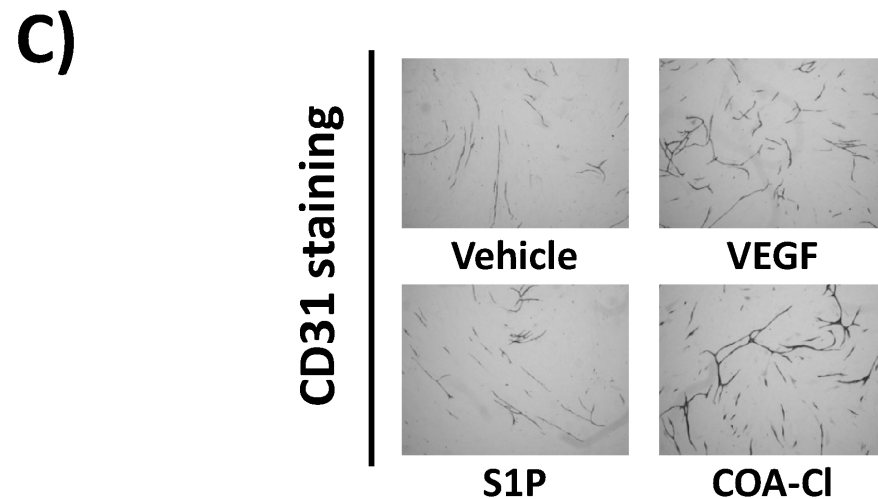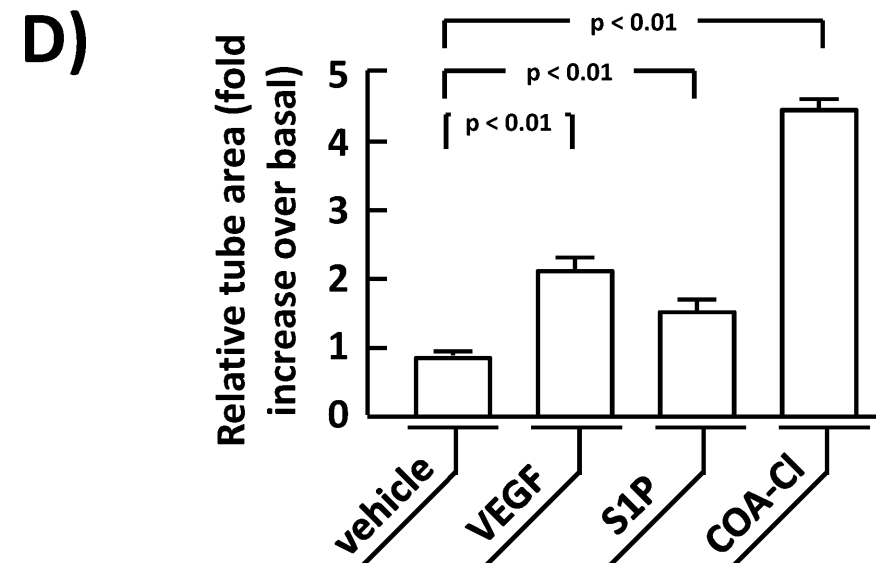

Supplement: prp20002-e00068-SD1.pdf [file prp20002-e00068-SD1.pdf]
